# Supplementary material for: Microscopy aided detection of the self-intercalation mechanism and in situ electronic properties in chromium selenide
Source: Royal Society of Chemistry journal article supplement (doi:10.1039/d4nr00048j), 2024-01-01
Supplement: d4nr00048j1.pdf [file d4nr00048j1.pdf]

## Supplementary Material

### Microscopic Detection of Self-intercalated Mechanism and In-situ Electronic Properties in Chromium Selenide

Jinding Zhang<sup>1</sup>, Yulong Xiao<sup>1</sup>, Kaihui Li<sup>1</sup>, Ying Chen<sup>1</sup>, Songlong Liu<sup>3</sup>, Wenjie Luo<sup>1</sup>, Xueying Liu<sup>1</sup>, Shiyong Liu<sup>1</sup>, Yiliu Wang<sup>3</sup>, Si-Yu Li<sup>1,4,\*</sup>, Anlian Pan<sup>1,2,\*</sup>

<sup>1</sup>Key Laboratory for Micro-Nano Physics and Technology of Hunan Province, Hunan Institute of Optoelectronic Integration and College of Materials Science and Engineering, Hunan University, Changsha 410082, People's Republic of China

<sup>2</sup>School of Physics and Electronics, Hunan Normal University, Changsha 410081, People's Republic of China

<sup>3</sup>School of Physics and Electronics, Hunan University, Changsha 410082, People's Republic of China

<sup>4</sup>Greater Bay Area Institute for Innovation, Hunan University, Guangzhou 511300, People's Republic of China

\*Correspondence and requests for materials should be addressed to S.Y.L (e-mail: lisiyu@hnu.edu.cn) and A.L.P. (e-mail: anlian.pan@hnu.edu.cn).

#### EXPERIMENTAL METHOD

**CVD synthesis route of Cr<sub>1+n</sub>Se<sub>2</sub> nanoflakes on mica.** We use Se (100 mg, Aladdin, 99.9%) and anhydrous CrCl<sub>3</sub> powder (10 mg, Aladdin, 99.9%) as the sources of the reaction and put them into the upstream and downstream of the tube, respectively. Then the freshly cleaved mica is placed inclined downstream of the CrCl<sub>3</sub>, which is about 1cm away from CrCl<sub>3</sub>. Before the heating process, high-purity argon (Ar, 2000 sccm) gas is loaded to purge the reaction tube for 5 min. The temperature of the tube furnace is increased from room temperature to 700–730°C within 20 min with a mixture of Ar (45 sccm) and hydrogen (H<sub>2</sub>, 3 sccm), and the furnace temperature is maintained for 5 min for sample growth.

**The transfer processes of CVD-synthesized 2D Cr<sub>1+n</sub>Se<sub>2</sub> nanoflakes.** First of all, the Self-prepared propylene carbonate (PPC) solutions were spin coated onto Cr<sub>1+n</sub>Se<sub>2</sub>/mica. We paste a layer of heat-resistant double-sided tape on top of the dried PPC, and then paste a glass slide on top of the double-sided tape. After such a simple transfer device is ready, we can enter the formal transfer process. The process can be divided into two parts: 1) We soaked the prepared transfer device in deionized water and then used tweezers to gently separate the mica from the PPC along the edge of the mica. At this point, Cr<sub>1+n</sub>Se<sub>2</sub> on mica has been transferred to PPC. 2) The PPC with the sample is attached to the target substrate and heated to 70 ° C, and then the sample is transferred to the target substrate because of the thermal release property of PPC. Finally, the PPC connected with the heat-resistant tape and the glass slide is taken apart together.

**The STM/STS measurements.** The scanning tunneling microscopy (STM) system was an ultrahigh vacuum single-probe scanning probe microscope USM-1400 from UNISOKU in Japan. All STM and scanning tunneling spectroscopy (STS) measurements were performed at liquid-nitrogen temperature (78 K) and the STM images were taken in a constant-current scanning mode. The STM tips were obtained by chemical etching from a wire of Pt(80%) Ir(20%) alloys. Lateral dimensions observed in the STM images were calibrated using a standard graphene lattice as well as a Si (111)-(7×7) lattice and the STS spectra were calibrated using a graphene. The STS spectrum, i.e., the  $dI/dV$ - $V$  curve, was carried out with a standard lock-in technique by applying alternating current modulation of the bias voltage of 10 mV (771 Hz) to the tunneling bias.

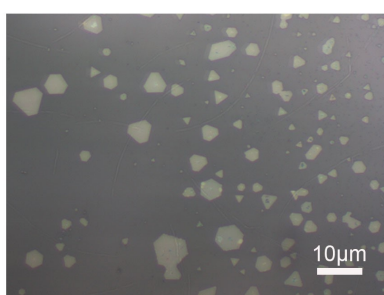

**Figure S1.** OM images of the  $\text{Cr}_{1+n}\text{Se}_2$  nanoflakes on mica grown by horizontal placement of substrate.

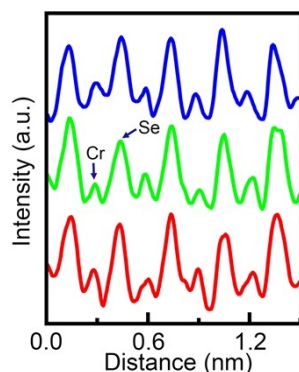

**Figure S2.** The three profile lines along vertical direction taken at the Se-Cr-Se-Cr-Se structure area.

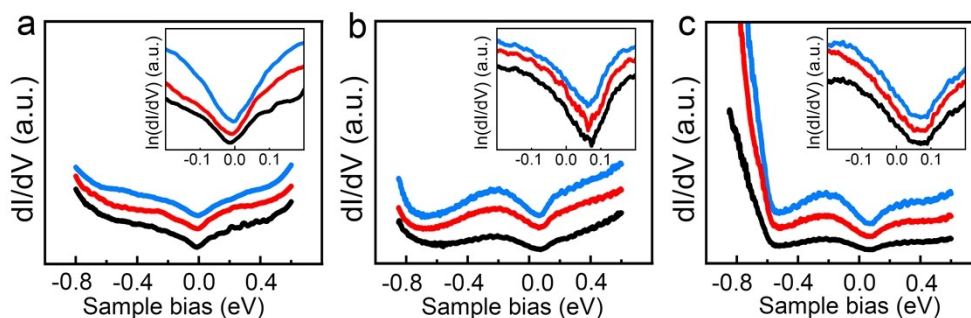

**Figure S3.** More STS spectra obtained in the  $\text{Cr}_2\text{Se}_2$ ,  $\text{Cr}_{1.5}\text{Se}_2$  and  $\text{Cr}_{1.25}\text{Se}_2$  regions, respectively. The inset shows the same spectra near the Fermi level in logarithmic

form.

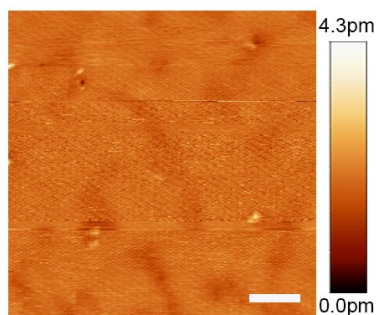

**Figure S4.** The STM image of the original flat region in the Cr<sub>1+n</sub>Se<sub>2</sub> nanoflake before the tip pulse ( $I=100$  pA,  $V_{\text{sample}}=1.6\text{V}$ ). Scale bar: 5 nm.

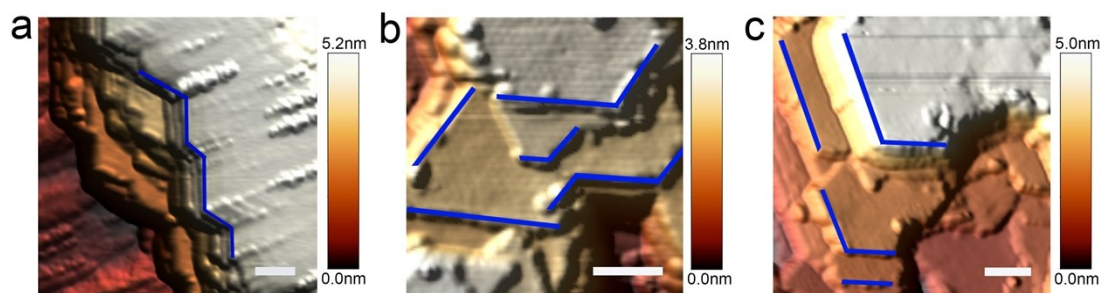

**Figure S5.** The STM images of cut boundaries after the tip pulse ( $I=100$  pA,  $V_{\text{sample}}=1.5\text{V}$ ). Scale bar: 5 nm. The directions of the boundary edges are highlighted by the blue lines.
